# Supplementary material for: Overexpression of GSN could decrease inflammation and apoptosis in EAE and may enhance vitamin D therapy on EAE/MS
Source: PubMed Central journal article supplement (PMC5428824; doi:10.1038/s41598-017-00684-w), 2017-04-04

# Overexpression of GSN could decrease inflammation and apoptosis in EAE and may enhance vitamin D therapy on EAE/MS

Jifang Gao, Zhaoyu Qin, Xinyuan Guan, Juanjuan Guo, Huaqing Wang, Shilian Liu

**Fig. S1** A, The uncropped full-length gels of Fig.5B-I. B, The uncropped full-length gels of Fig. 6A-I and B-I. C, The uncropped full-length gels of Fig. 2G-I. D, The uncropped full-length gels of Fig. 2H-I.

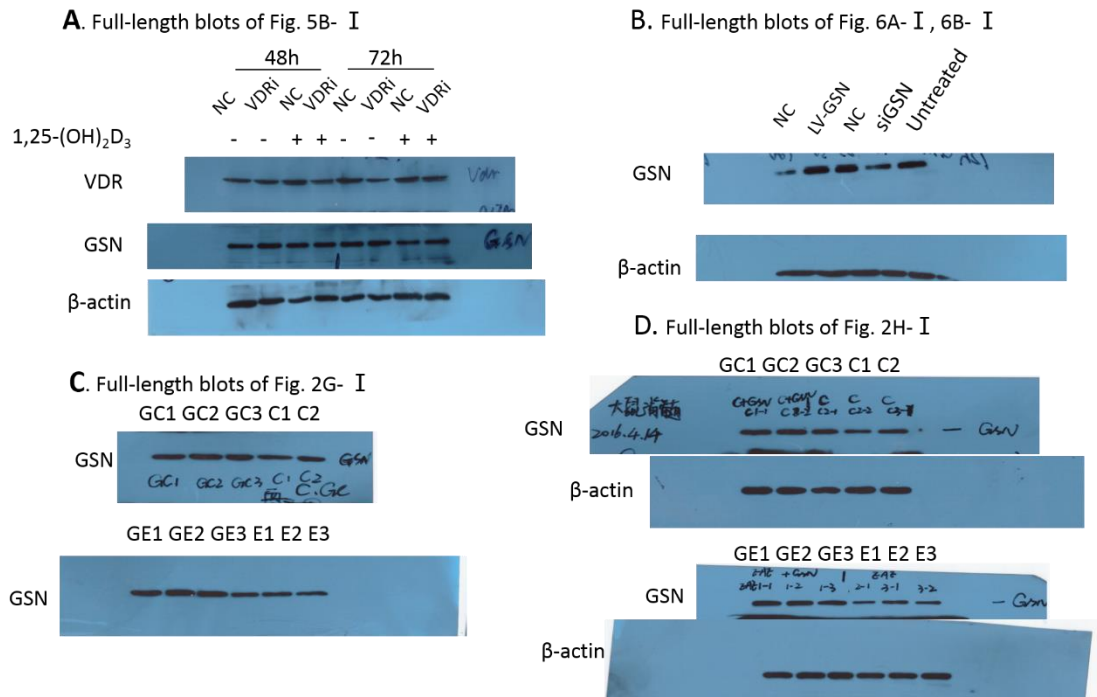

**Fig. S2** A, The weight changes of EAE rats during the whole progress of EAE. B, Scores of the EAE rats during the whole progress of EAE.

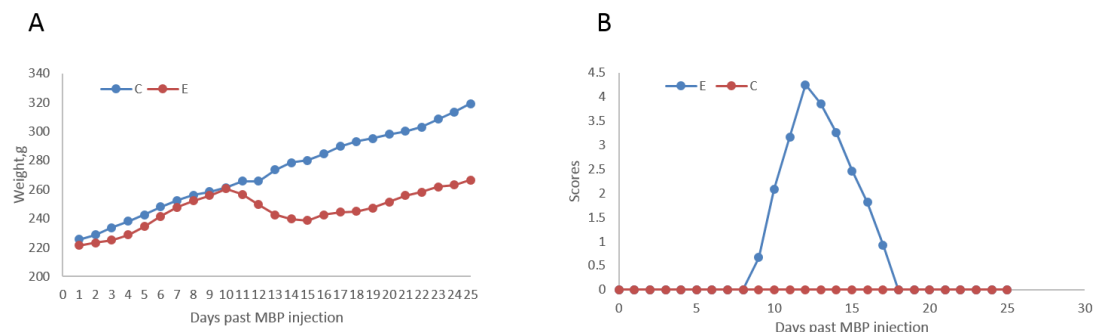

Supplement: 41598_2017_684_MOESM1_ESM.pdf [file 41598_2017_684_MOESM1_ESM.pdf]
